# Supplementary material for: Kasugamycin potentiates rifampicin and limits emergence of resistance in Mycobacterium tuberculosis by specifically decreasing mycobacterial mistranslation
Source: eLife journal article supplement (doi:10.7554/elife.36782), 2018-08-28
Supplement: supp [file elife-36782-supp-v1.zip]

Archive with 14 entries (14 files):
- elife_poa_e36782_Figure_1_figure_supplement_3.pdf
- elife_poa_e36782_Figure_1_figure_supplement_1.pdf
- elife_poa_e36782_Figure_1_figure_supplement_2.pdf
- elife_poa_e36782_Figure_3_figure_supplement_4.pdf
- elife_poa_e36782_Figure_2_figure_supplement_1.pdf
- elife_poa_e36782_Transparent_Reporting_File.docx
- elife_poa_e36782_Figure_3_figure_supplement_3.pdf
- elife_poa_e36782_Figure_3_figure_supplement_2.pdf
- elife_poa_e36782_Figure_2_figure_supplement_2.pdf
- elife_poa_e36782_Supplementary_File_3.docx
- elife_poa_e36782_Figure_3_figure_supplement_5.pdf
- elife_poa_e36782_Figure_3_figure_supplement_1.pdf
- elife_poa_e36782_Supplementary_file_1.docx
- elife_poa_e36782_Supplementary_File_2.docx
