# Supplementary material for: Kasugamycin potentiates rifampicin and limits emergence of resistance in Mycobacterium tuberculosis by specifically decreasing mycobacterial mistranslation
Source: eLife journal article supplement (doi:10.7554/elife.36782), 2018-08-28
Supplement: supp [file elife-36782-supp-v1.zip]

Figure 3 Supplemental Figure 5

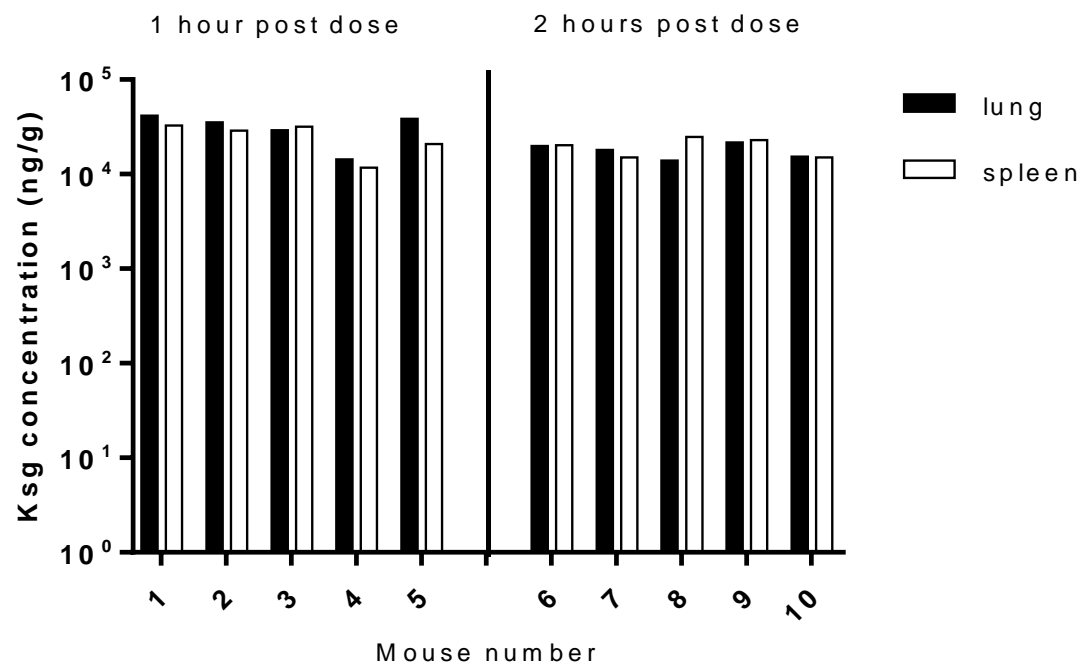

**Fig. 3 Supplemental Fig. 5. Tissue (lung/ spleen) pharmacokinetics of kasugamycin following intra-peritoneal administration.** Tissue homogenates were used for PK analysis.
