# Supplementary material for: Kasugamycin potentiates rifampicin and limits emergence of resistance in Mycobacterium tuberculosis by specifically decreasing mycobacterial mistranslation
Source: eLife journal article supplement (doi:10.7554/elife.36782), 2018-08-28
Supplement: supp [file elife-36782-supp-v1.zip]

## Figure 1 Supplemental Figure 2

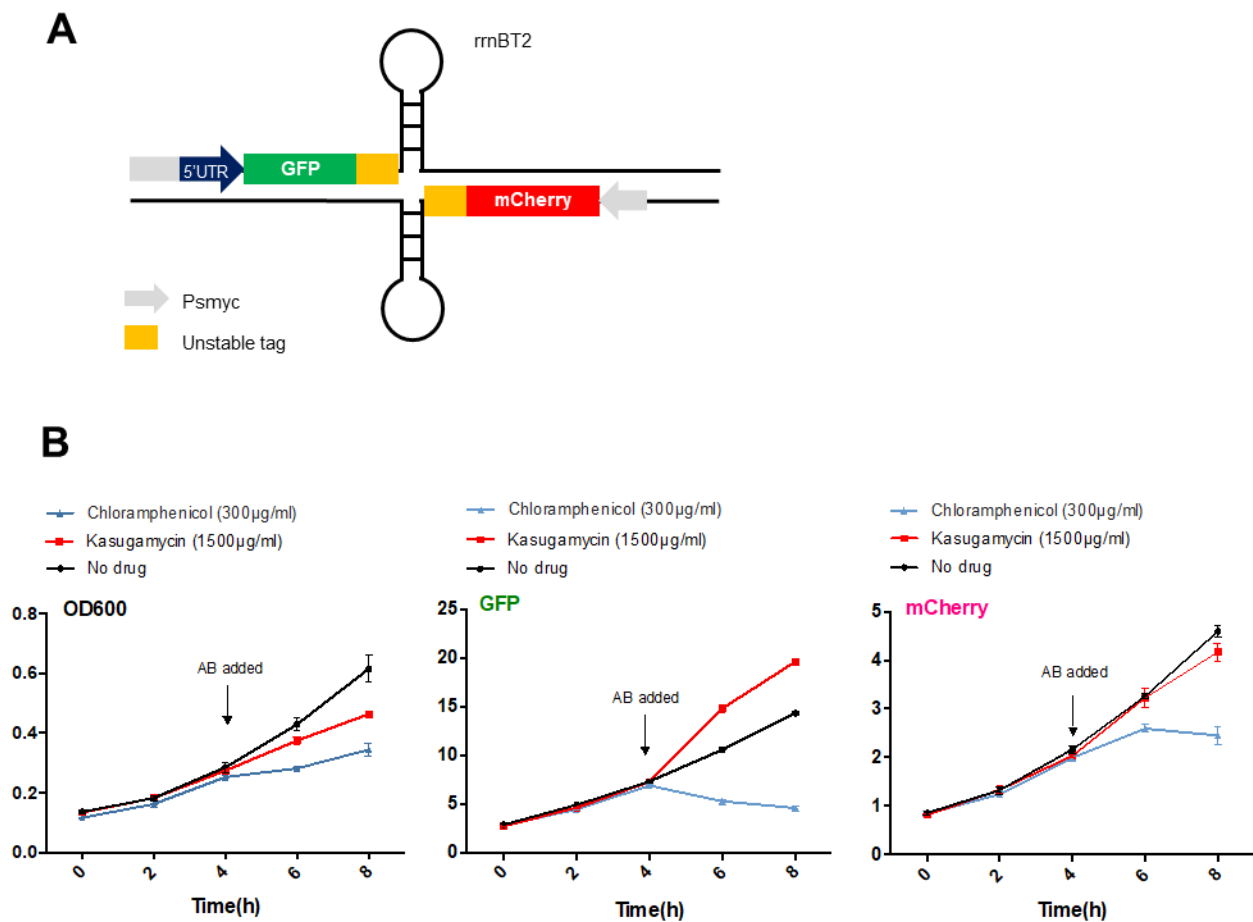

**Fig. 1 Supplemental Fig. 2. High-dose kasugamycin does not significantly inhibit translation of a canonical or leaderless transcript in *M. smegmatis* at doses much higher than required to reduce mistranslation.** A strain of *M. smegmatis* was transformed with an episomal plasmid expressing *gfp* from the promoter Psmc (canonical promoter with 5' UTR) and a leaderless version of Psmc driving *mCherry* (A – schematic of the reporter). Chloramphenicol inhibited translation of both transcripts, whereas kasugamycin at 1500 µg/ml failed to significantly attenuate translation from either transcript. AB, antibiotics.
