# Supplementary material for: Kasugamycin potentiates rifampicin and limits emergence of resistance in Mycobacterium tuberculosis by specifically decreasing mycobacterial mistranslation
Source: eLife journal article supplement (doi:10.7554/elife.36782), 2018-08-28
Supplement: supp [file elife-36782-supp-v1.zip]

## Figure 1 Supplemental Figure 1

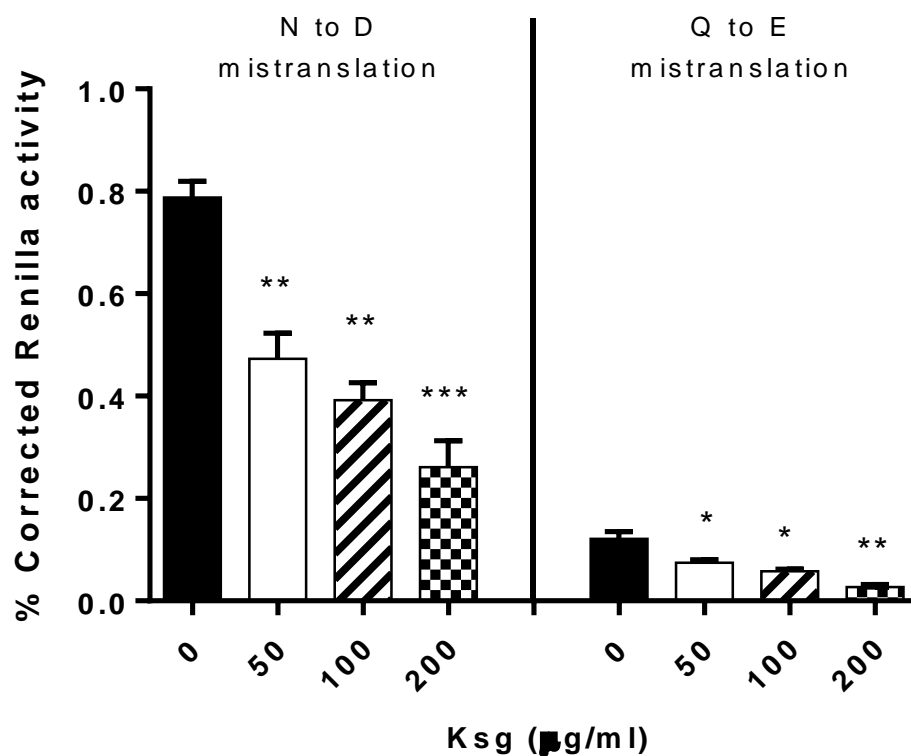

**Fig. 1 Supplemental Figure 1. Kasugamycin decreases asparagine to aspartate and glutamine to glutamine mycobacterial mistranslation.** Mistranslation measured by gain-of-function Renilla-Firefly dual reporter as previously described: see Methods and (Su et al., 2016) . \* $p < 0.05$ , \*\* $p < 0.01$ , \*\*\* $p < 0.001$  by Student's t-test.
