# Supplementary material for: Kasugamycin potentiates rifampicin and limits emergence of resistance in Mycobacterium tuberculosis by specifically decreasing mycobacterial mistranslation
Source: eLife journal article supplement (doi:10.7554/elife.36782), 2018-08-28
Supplement: supp [file elife-36782-supp-v1.zip]

## Figure 3 Supplemental Figure 4

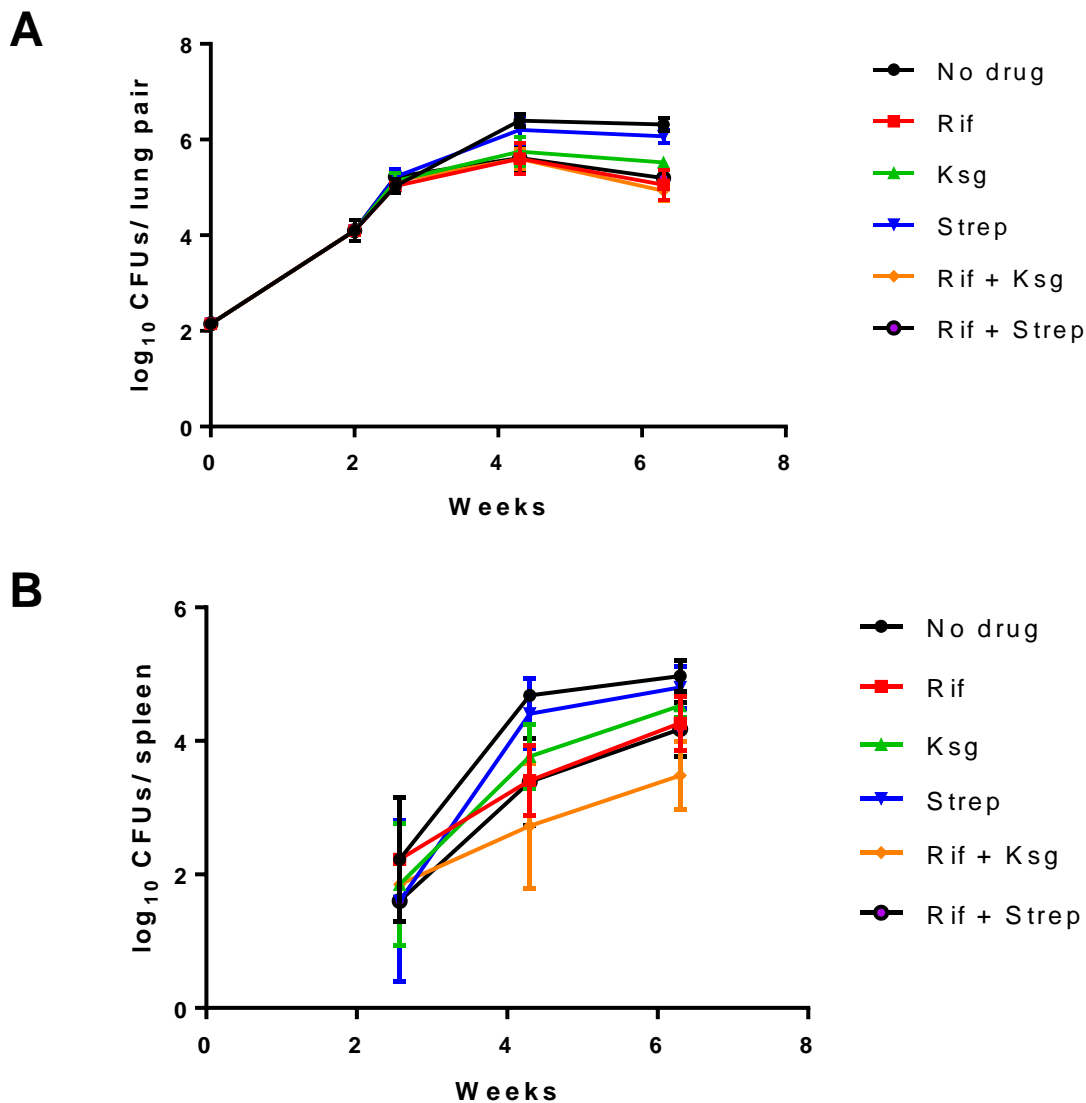

**Fig. 3 Supplemental Fig. 4. Organ burden of Mtb-infected mice treated as per the protocol in Fig. 2B.** Organ burdens in lungs (left panel) and spleen (right panel) at indicated time-points shown. The data for the last point (4 weeks' treatment) is shown in Fig. 2C.
