# Supplementary material for: Kasugamycin potentiates rifampicin and limits emergence of resistance in Mycobacterium tuberculosis by specifically decreasing mycobacterial mistranslation
Source: eLife journal article supplement (doi:10.7554/elife.36782), 2018-08-28
Supplement: supp [file elife-36782-supp-v1.zip › elife_poa_e36782_Figure_2_figure_supplement_1.pdf]

## Figure 2 Supplemental Figure 1

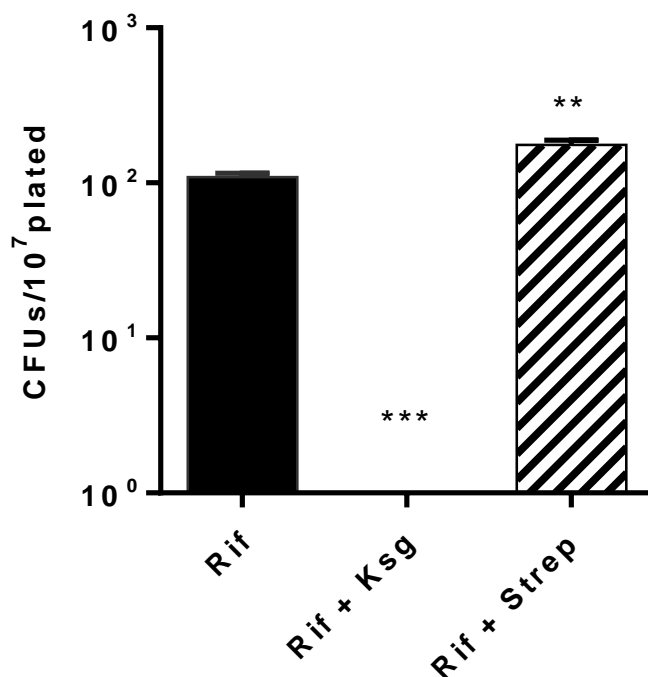

**Fig. 2 Supplemental Fig. 1. Kasugamycin but not streptomycin decreases Msm rifampicin plate tolerance.** Cells were plated on rifampicin-agar +/- kasugamycin (50µg/ml) or streptomycin (0.2 µg/ml) or LB alone. Survival fraction on rifampicin was measured after 5-7 days. \*\*p<0.01, \*\*\*p<0.001 by Student's t-test.
