# Supplementary material for: Kasugamycin potentiates rifampicin and limits emergence of resistance in Mycobacterium tuberculosis by specifically decreasing mycobacterial mistranslation
Source: eLife journal article supplement (doi:10.7554/elife.36782), 2018-08-28
Supplement: supp [file elife-36782-supp-v1.zip › elife_poa_e36782_Figure_2_figure_supplement_2.pdf]

## Figure 2 Supplemental Figure 2

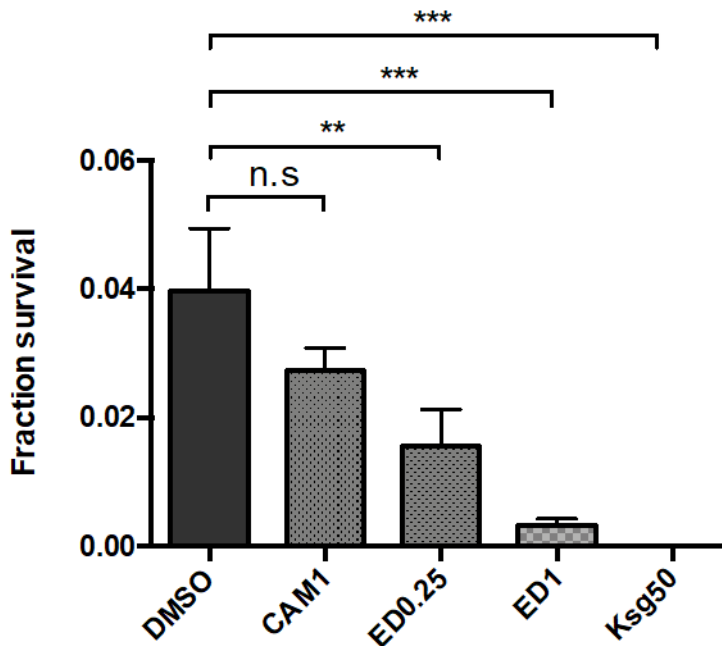

**Fig. 2 Supplemental Fig. 2. The initiation inhibitors edeine and kasugamycin decrease Msm rifampicin plate tolerance.** Cells were plated on rifampicin-agar (25µg/ml) +/- DMSO or other antibiotics as shown (edeine, ED 0.25-1µM, chloramphenicol, CAM 1µg/ml and kasugamycin, Ksg, 50µg/ml). The translation inhibitors at the concentration used did not affect plating efficiency when used as a solitary agent. Survival fraction (compared with no antibiotic) was measured after 5-6 days. \*\*p<0.01, \*\*\*p<0.001, n.s. no significant difference by Student's t-test.
