# Supplementary material for: Kasugamycin potentiates rifampicin and limits emergence of resistance in Mycobacterium tuberculosis by specifically decreasing mycobacterial mistranslation
Source: eLife journal article supplement (doi:10.7554/elife.36782), 2018-08-28
Supplement: supp [file elife-36782-supp-v1.zip › elife_poa_e36782_Figure_3_figure_supplement_1.pdf]

## Figure 3 Supplemental Figure 1

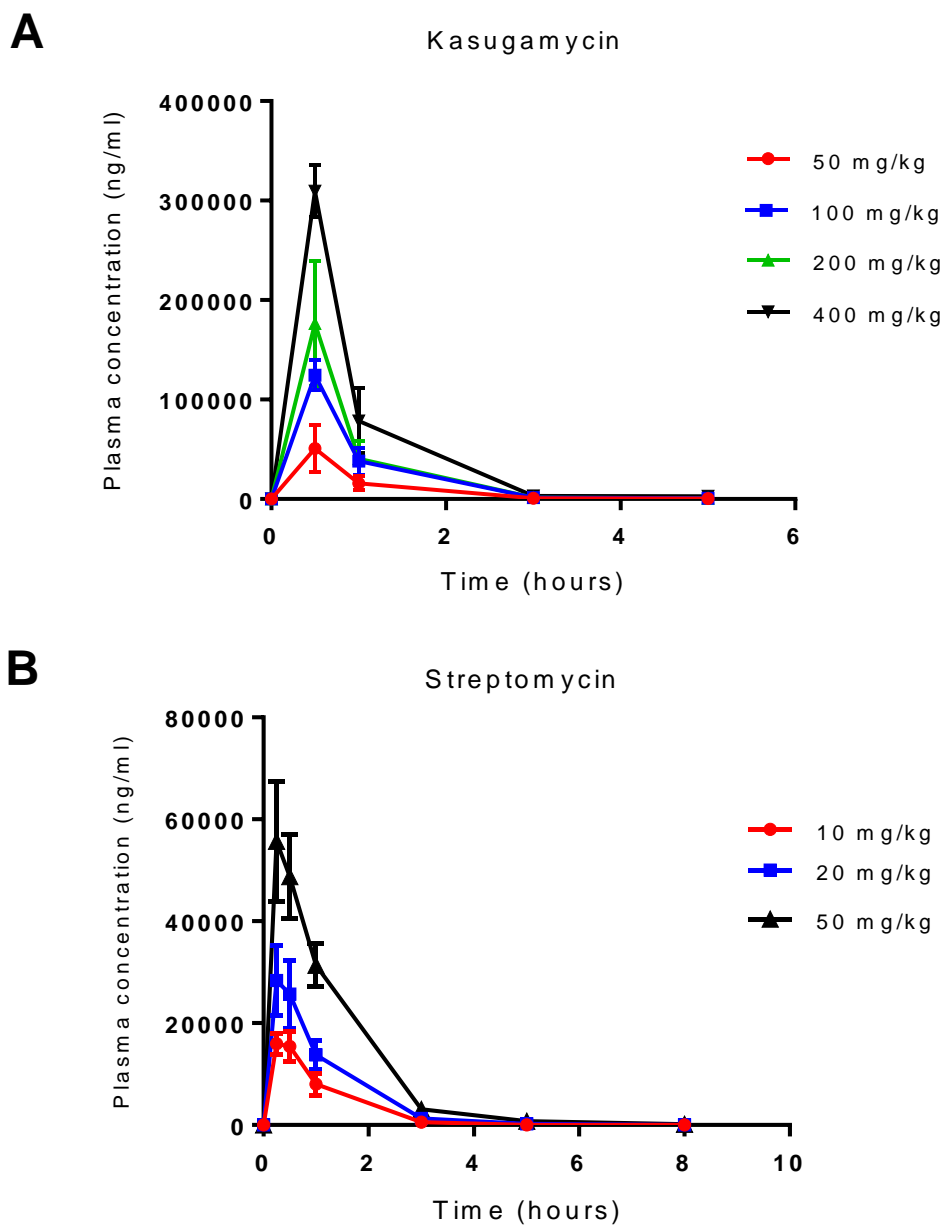

**Fig. 3 Supplemental Fig. 1. Pharmacokinetics of intra-peritoneal administration of kasugamycin and streptomycin.** Kasugamycin (top) and streptomycin were given by intra-peritoneal injection and plasma concentration measured by liquid chromatography mass-spectrometry.
