# Supplementary material for: Kasugamycin potentiates rifampicin and limits emergence of resistance in Mycobacterium tuberculosis by specifically decreasing mycobacterial mistranslation
Source: eLife journal article supplement (doi:10.7554/elife.36782), 2018-08-28
Supplement: supp [file elife-36782-supp-v1.zip › elife_poa_e36782_Figure_3_figure_supplement_2.pdf]

## Figure 3 Supplemental Figure 2

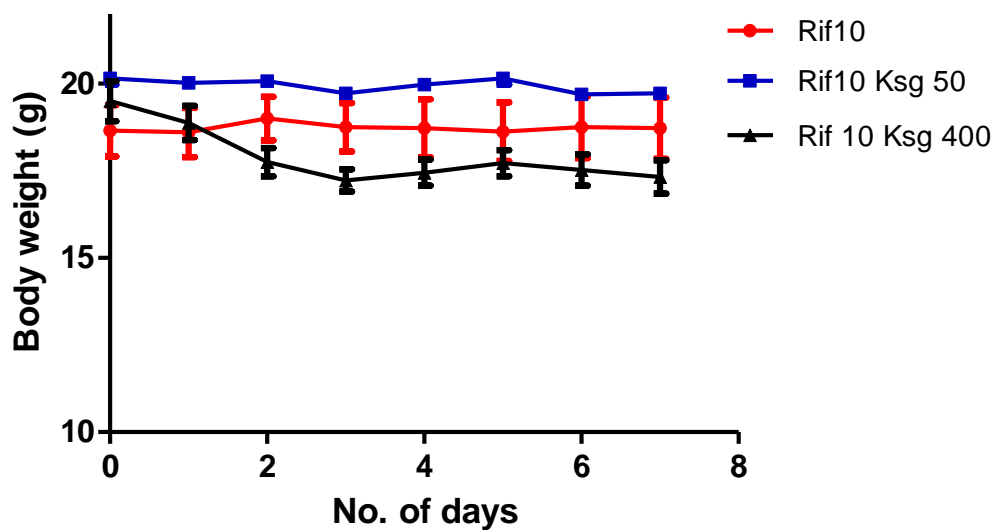

**Fig. 3 Supplemental Fig. 2. Kasugamycin-rifampicin co-administration is toxic to mice at high doses.** Mice were given ksg (intra-peritoneal injection) and rifampicin (oral gavage) daily at the indicated doses. Weight was measured daily.
