# Supplementary material for: Kasugamycin potentiates rifampicin and limits emergence of resistance in Mycobacterium tuberculosis by specifically decreasing mycobacterial mistranslation
Source: eLife journal article supplement (doi:10.7554/elife.36782), 2018-08-28
Supplement: supp [file elife-36782-supp-v1.zip › elife_poa_e36782_Figure_3_figure_supplement_3.pdf]

## Figure 3 Supplemental Figure 3

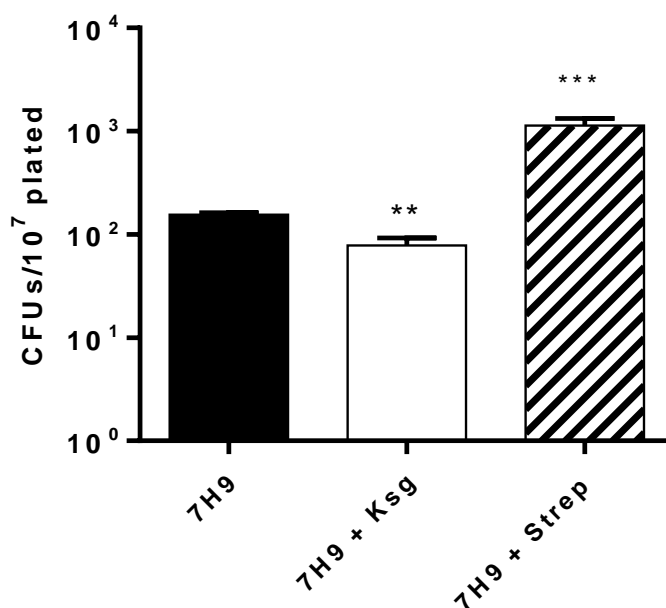

**Fig. 3 Supplemental Fig. 3. Kasugamycin but not streptomycin pre-treatment increases rifampicin susceptibility in Msm.** Msm cultures were pre-treated with ksg (50µg/ml) or streptomycin (0.2µg/ml) for 3 hours. Cells were then spun down, washed, resuspended and plated on rifampicin-agar or LB. Colonies were counted after 7 days.
