# Supplementary material for: Kasugamycin potentiates rifampicin and limits emergence of resistance in Mycobacterium tuberculosis by specifically decreasing mycobacterial mistranslation
Source: eLife journal article supplement (doi:10.7554/elife.36782), 2018-08-28
Supplement: supp [file elife-36782-supp-v1.zip › elife_poa_e36782_Supplementary_file_1.docx]

**Supplementary Table 1**

| Antibiotic | Minimum Inhibitory Concentration (MIC) (µg/ml) | | Cmax / MIC* |
| --- | --- | --- | --- |
| *M. smegmatis*-mc2-155 | *M. tuberculosis*-H37Rv |
| Rifampicin | 2.5 | 0.125 | N.D. |
| Kasugamycin | 2000 | 400 | 0.77 |
| Streptomycin | 0.5 | 0.5 | 7† |

* Cmax/MIC calculated from maximal plasma concentration of drug and the *in vitro* MIC of H37Rv.

† The Cmax for Streptomycin at the delivered dose (3mg/kg) was derived by linear regression of the PK measurements shown in Figure 2, Supplemental Figure 1.
